# Supplementary material
Source: PubMed Central journal article supplement (PMC4306685)
Supplement: supp_M054429_jlr.M054429-1.pdf [file supp_M054429_jlr.M054429-1.pdf]

## Supplementary Information

### Hepatic oleate regulates adipose tissue lipogenesis and fatty acid oxidation

Maggie S. Burhans<sup>1</sup>, Matthew T. Flowers<sup>2</sup>, Kristin R. Harrington<sup>2</sup>, Laura M. Bond<sup>2</sup>, Chang-An Guo<sup>2</sup>, Rozalyn M. Anderson<sup>3,4</sup>, and James M. Ntambi<sup>1,2,\*</sup>

<sup>1</sup>Department of Nutritional Sciences University of Wisconsin-Madison, 433 Babcock Drive, Madison, WI 53706 USA

<sup>2</sup>Department of Biochemistry, University of Wisconsin-Madison, 433 Babcock Drive, Madison, WI 53706 USA

<sup>3</sup>Department of Medicine, University of Wisconsin-Madison, Madison, WI 53705 USA

<sup>4</sup>Geriatric Research, Education, and Clinical Center, VA Medical Center, Madison, Wisconsin 53705 USA

\*Correspondence: James M. Ntambi, [jmntambi@wisc.edu](mailto:jmntambi@wisc.edu)

**A** GKO

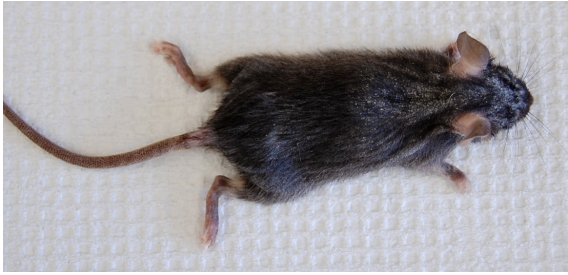

**B** GLS5

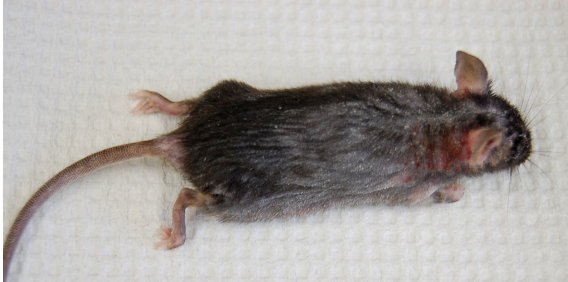

**C** GLS3

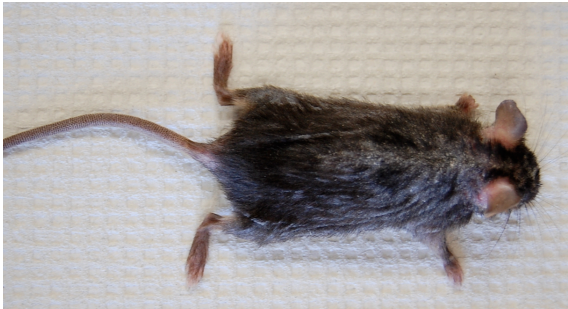

**Supplemental Figure 1. GKO, GLS5 and GLS3 mice exhibit dry skin and alopecia.**  
(A) GKO, (B) GLS5 and (C) GLS3 adult males were fed a lipogenic diet diet for 10 days.

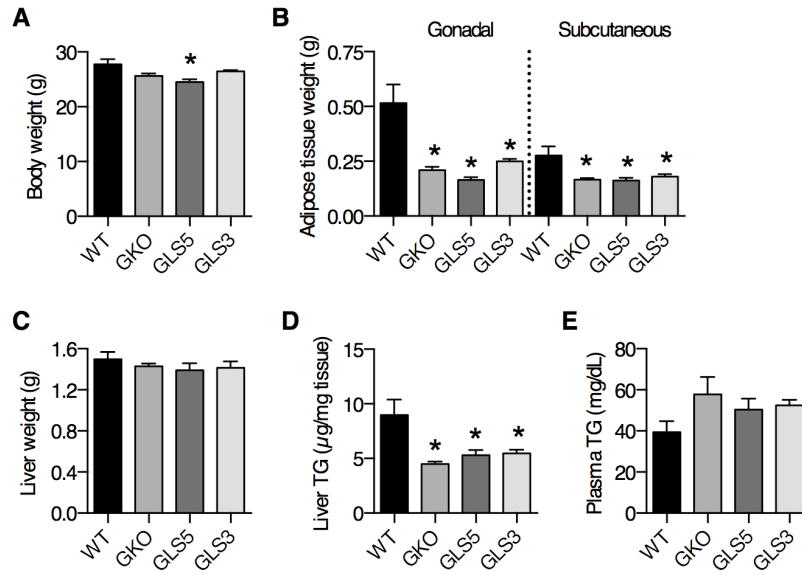

**Supplemental Figure 2. Adiposity and liver TG do not differ among GKO, GLS5 and GLS3 chow-fed male mice.** Chow-fed 10–12 week old male mice were 4 hour fasted (n=5–6/group). (A) Body weight, (B) gonadal and subcutaneous white adipose tissue weights and (C) liver tissue weight were determined. (D) Liver TG and (E) plasma TG were measured by enzymatic colorimetric assays. Values are mean  $\pm$  SEM, \* $P < 0.05$  vs. WT, one-way ANOVA analysis with Tukey's post-hoc test.

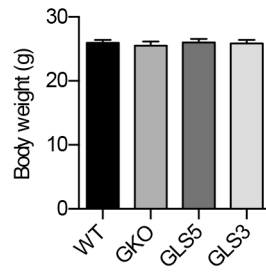

**Supplemental Figure 3. Body weight of male mice at start of lipogenic diet (LD) feeding.** Body weight of Male mice (n=9–11/group) was determined at the start of the LD feeding study. Values are mean  $\pm$  SEM, one-way ANOVA analysis with Tukey's post-hoc test.

**Table S1. Liver cholesteryl ester fatty acid composition in 10 d LD-fed mice**

| Fatty acid   |                         | WT                | GKO                 | GLS5                  | GLS3                          |
|--------------|-------------------------|-------------------|---------------------|-----------------------|-------------------------------|
| 16:0         | $\mu\text{g}/\text{mg}$ | $0.189 \pm 0.029$ | $0.258 \pm 0.020$   | $0.175 \pm 0.023$     | $0.217 \pm 0.018$             |
|              | % of total              | $20.7 \pm 1.9$    | $38.1 \pm 1.3^*$    | $30.4 \pm 1.7^{*\#}$  | $34.2 \pm 2.1^*$              |
| 16:1n-7      | $\mu\text{g}/\text{mg}$ | $0.115 \pm 0.019$ | $0.005 \pm 0.001^*$ | $0.007 \pm 0.001^*$   | $0.025 \pm 0.004^{*\#\wedge}$ |
|              | % of total              | $12.5 \pm 1.3$    | $0.7 \pm 0.1^*$     | $1.3 \pm 0.1^{*\#}$   | $4.0 \pm 0.9^{*\#\wedge}$     |
| 18:0         | $\mu\text{g}/\text{mg}$ | $0.148 \pm 0.030$ | $0.274 \pm 0.034^*$ | $0.208 \pm 0.014$     | $0.243 \pm 0.024$             |
|              | % of total              | $16.3 \pm 2.6$    | $39.9 \pm 2.7^*$    | $37.1 \pm 2.2^*$      | $38.1 \pm 2.0^*$              |
| 18:1n-9      | $\mu\text{g}/\text{mg}$ | $0.318 \pm 0.070$ | $0.054 \pm 0.007^*$ | $0.084 \pm 0.015^*$   | $0.046 \pm 0.005^*$           |
|              | % of total              | $34.3 \pm 4.0$    | $8.3 \pm 1.4^*$     | $14.4 \pm 2.0^{*\#}$  | $7.4 \pm 1.0^{*\wedge}$       |
| 18:1n-7      | $\mu\text{g}/\text{mg}$ | $0.026 \pm 0.012$ | ND                  | ND                    | $0.008 \pm 0.002$             |
|              | % of total              | $2.6 \pm 0.9$     |                     |                       | $1.2 \pm 0.4$                 |
| 18:2n-6      | $\mu\text{g}/\text{mg}$ | $0.032 \pm 0.004$ | $0.030 \pm 0.005$   | $0.039 \pm 0.003$     | $0.041 \pm 0.005$             |
|              | % of total              | $3.6 \pm 0.5$     | $4.7 \pm 1.2$       | $7.0 \pm 0.6$         | $6.6 \pm 1.0$                 |
| 20:4n-6      | $\mu\text{g}/\text{mg}$ | $0.009 \pm 0.001$ | $0.009 \pm 0.002$   | $0.009 \pm 0.001$     | $0.011 \pm 0.001$             |
|              | % of total              | $1.0 \pm 0.2$     | $1.4 \pm 0.4$       | $1.7 \pm 0.3$         | $1.8 \pm 0.3$                 |
| 20:5n-3      | $\mu\text{g}/\text{mg}$ | ND                | ND                  | $0.004 \pm 0.001$     | $0.002 \pm 0.000^\wedge$      |
|              | % of total              |                   |                     | $0.6 \pm 0.2$         | $0.3 \pm 0.0^\wedge$          |
| 22:6n-3      | $\mu\text{g}/\text{mg}$ | $0.008 \pm 0.000$ | $0.004 \pm 0.001$   | $0.004 \pm 0.001$     | $0.007 \pm 0.002$             |
|              | % of total              | $0.8 \pm 0.2$     | $0.6 \pm 0.1$       | $0.8 \pm 0.1$         | $1.2 \pm 0.3$                 |
| 18:1n-9/18:0 | DI                      | $2.37 \pm 0.84$   | $0.22 \pm 0.06^*$   | $0.41 \pm 0.10^*$     | $0.20 \pm 0.04^*$             |
| 16:1n-7/16:0 | DI                      | $0.62 \pm 0.12$   | $0.02 \pm 0.0^*$    | $0.04 \pm 0.01^{*\#}$ | $0.12 \pm 0.04^{*\#\wedge}$   |

10 week old male mice were fed a lipogenic diet (LD) for 10 days and fasted 4 hours prior to tissue collection. Hepatic lipids were extracted, lipid species were separated by TLC, extracted, transmethylated and analyzed by gas liquid chromatography. DI, desaturation index. Values are mean  $\pm$  SEM, (n=4–6/group). \* $P < 0.5$  vs. WT, # $P < 0.05$  vs. GKO;  $^\wedge P < 0.05$  vs. GLS5; one-way ANOVA analysis with Tukey's post-hoc test.

**Table S2. Liver triacylglycerol fatty acid composition in 10 d LD-fed mice**

| Fatty acid   |                         | WT              | GKO                          | GLS5                          | GLS3                           |
|--------------|-------------------------|-----------------|------------------------------|-------------------------------|--------------------------------|
| 16:0         | $\mu\text{g}/\text{mg}$ | 4.74 $\pm$ 0.92 | 0.95 $\pm$ 0.13              | 8.43 $\pm$ 1.62 <sup>#</sup>  | 3.00 $\pm$ 0.90 <sup>^</sup>   |
|              | % of total              | 26.8 $\pm$ 1.59 | 41.7 $\pm$ 0.92 <sup>*</sup> | 39.6 $\pm$ 1.47 <sup>*</sup>  | 43.0 $\pm$ 1.27 <sup>*</sup>   |
| 16:1n-7      | $\mu\text{g}/\text{mg}$ | 1.50 $\pm$ 0.35 | 0.01 $\pm$ 0.00 <sup>*</sup> | 0.08 $\pm$ 0.02 <sup>*#</sup> | 0.10 $\pm$ 0.03 <sup>*#</sup>  |
|              | % of total              | 8.54 $\pm$ 1.13 | 0.25 $\pm$ 0.05 <sup>*</sup> | 0.36 $\pm$ 0.02 <sup>*</sup>  | 1.74 $\pm$ 0.30 <sup>*#^</sup> |
| 18:0         | $\mu\text{g}/\text{mg}$ | 0.27 $\pm$ 0.05 | 0.49 $\pm$ 0.06              | 5.63 $\pm$ 1.44 <sup>*#</sup> | 1.71 $\pm$ 0.43 <sup>^</sup>   |
|              | % of total              | 1.54 $\pm$ 0.17 | 21.9 $\pm$ 1.13 <sup>*</sup> | 26.7 $\pm$ 3.49 <sup>*</sup>  | 25.8 $\pm$ 1.35 <sup>*</sup>   |
| 18:1n-9      | $\mu\text{g}/\text{mg}$ | 7.77 $\pm$ 0.87 | 0.29 $\pm$ 0.05 <sup>*</sup> | 3.80 $\pm$ 1.02 <sup>*#</sup> | 0.76 $\pm$ 0.21 <sup>*^</sup>  |
|              | % of total              | 45.5 $\pm$ 2.47 | 12.7 $\pm$ 0.49 <sup>*</sup> | 17.7 $\pm$ 2.66 <sup>*</sup>  | 11.4 $\pm$ 0.45 <sup>*^</sup>  |
| 18:1n-7      | $\mu\text{g}/\text{mg}$ | 1.35 $\pm$ 0.10 | 0.02 $\pm$ 0.00 <sup>*</sup> | 0.11 $\pm$ 0.03 <sup>*#</sup> | 0.12 $\pm$ 0.03 <sup>*#</sup>  |
|              | % of total              | 8.02 $\pm$ 0.66 | 0.75 $\pm$ 0.04 <sup>*</sup> | 0.53 $\pm$ 0.07 <sup>*</sup>  | 2.09 $\pm$ 0.34 <sup>*#^</sup> |
| 18:2n-6      | $\mu\text{g}/\text{mg}$ | 0.97 $\pm$ 0.17 | 0.34 $\pm$ 0.06              | 2.19 $\pm$ 0.57 <sup>#</sup>  | 0.74 $\pm$ 0.21 <sup>^</sup>   |
|              | % of total              | 5.63 $\pm$ 0.68 | 14.9 $\pm$ 0.96 <sup>*</sup> | 9.87 $\pm$ 1.27 <sup>#</sup>  | 10.9 $\pm$ 0.87 <sup>*#</sup>  |
| 18:3n-3      | $\mu\text{g}/\text{mg}$ | 0.02 $\pm$ 0.01 | 0.00 $\pm$ 0.00 <sup>*</sup> | 0.02 $\pm$ 0.00 <sup>#</sup>  | 0.01 $\pm$ 0.00                |
|              | % of total              | 0.10 $\pm$ 0.02 | 0.07 $\pm$ 0.02              | 0.10 $\pm$ 0.01               | 0.09 $\pm$ 0.02                |
| 20:1n-9      | $\mu\text{g}/\text{mg}$ | 0.17 $\pm$ 0.02 | 0.01 $\pm$ 0.00 <sup>*</sup> | 0.11 $\pm$ 0.4 <sup>#</sup>   | 0.01 $\pm$ 0.00 <sup>*^</sup>  |
|              | % of total              | 1.05 $\pm$ 0.15 | 0.25 $\pm$ 0.02 <sup>*</sup> | 0.50 $\pm$ 0.13 <sup>*</sup>  | 0.20 $\pm$ 0.03 <sup>*^</sup>  |
| 20:4n-6      | $\mu\text{g}/\text{mg}$ | 0.04 $\pm$ 0.01 | 0.05 $\pm$ 0.01              | 0.12 $\pm$ 0.05               | 0.05 $\pm$ 0.01                |
|              | % of total              | 0.24 $\pm$ 0.03 | 2.16 $\pm$ 0.32 <sup>*</sup> | 0.57 $\pm$ 0.14 <sup>#</sup>  | 0.94 $\pm$ 0.17 <sup>#</sup>   |
| 22:5n-3      | $\mu\text{g}/\text{mg}$ | 0.01 $\pm$ 0.00 | 0.01 $\pm$ 0.00              | 0.01 $\pm$ 0.00 <sup>*#</sup> | 0.01 $\pm$ 0.00 <sup>^</sup>   |
|              | % of total              | 0.04 $\pm$ 0.01 | 0.24 $\pm$ 0.02 <sup>*</sup> | 0.07 $\pm$ 0.01 <sup>#</sup>  | 0.11 $\pm$ 0.03 <sup>#</sup>   |
| 22:6n-3      | $\mu\text{g}/\text{mg}$ | 0.05 $\pm$ 0.01 | 0.05 $\pm$ 0.01              | 0.18 $\pm$ 0.05 <sup>*#</sup> | 0.06 $\pm$ 0.02                |
|              | % of total              | 0.29 $\pm$ 0.06 | 2.31 $\pm$ 0.30 <sup>*</sup> | 0.83 $\pm$ 0.15 <sup>#</sup>  | 1.03 $\pm$ 0.16 <sup>#</sup>   |
| 18:1n-9/18:0 | DI                      | 30.1 $\pm$ 2.13 | 0.59 $\pm$ 0.06 <sup>*</sup> | 0.79 $\pm$ 0.25 <sup>*</sup>  | 0.45 $\pm$ 0.04 <sup>*</sup>   |
| 16:1n-7/16:0 | DI                      | 0.32 $\pm$ 0.03 | 0.01 $\pm$ 0.00 <sup>*</sup> | 0.01 $\pm$ 0.00 <sup>*</sup>  | 0.04 $\pm$ 0.01 <sup>*#^</sup> |

10 week old male mice were fed a lipogenic diet (LD) for 10 days and fasted 4 hours prior to tissue collection. Hepatic lipids were extracted, lipid species were separated by TLC, extracted, transmethylated and analyzed by gas liquid chromatography. DI, desaturation index. Values are mean  $\pm$  SEM, (n=4–6/group). \* $P$  < 0.5 vs. WT, # $P$  < 0.05 vs. GKO; ^ $P$  < 0.05 vs. GLS5; one-way ANOVA analysis with Tukey's post-hoc test.

**Table S3. Liver free fatty acid composition in 10 d LD-fed mice**

| Fatty acid   |                         | WT                | GKO                 | GLS5                   | GLS3                          |
|--------------|-------------------------|-------------------|---------------------|------------------------|-------------------------------|
| 16:0         | $\mu\text{g}/\text{mg}$ | $0.323 \pm 0.025$ | $0.268 \pm 0.021$   | $0.412 \pm 0.035^{\#}$ | $0.161 \pm 0.010^{*\#\wedge}$ |
|              | % of total              | $52.3 \pm 1.43$   | $58.2 \pm 1.38$     | $58.5 \pm 2.90$        | $50.0 \pm 0.94^{\#\wedge}$    |
| 16:1n-7      | $\mu\text{g}/\text{mg}$ | $0.016 \pm 0.003$ | $0.003 \pm 0.000^*$ | $0.005 \pm 0.001^*$    | $0.004 \pm 0.000^*$           |
|              | % of total              | $2.50 \pm 0.30$   | $0.71 \pm 0.08^*$   | $0.73 \pm 0.08^*$      | $1.32 \pm 0.12^{*\#\wedge}$   |
| 18:0         | $\mu\text{g}/\text{mg}$ | $0.189 \pm 0.011$ | $0.140 \pm 0.009$   | $0.224 \pm 0.026^{\#}$ | $0.118 \pm 0.004^{*\wedge}$   |
|              | % of total              | $30.9 \pm 3.07$   | $30.5 \pm 0.95$     | $31.5 \pm 1.61$        | $37.0 \pm 1.21^{\#}$          |
| 18:1n-9      | $\mu\text{g}/\text{mg}$ | $0.046 \pm 0.012$ | $0.014 \pm 0.001^*$ | $0.030 \pm 0.008$      | $0.012 \pm 0.001^{*\wedge}$   |
|              | % of total              | $7.29 \pm 1.42$   | $3.02 \pm 0.12^*$   | $3.94 \pm 0.71^*$      | $3.75 \pm 0.24^*$             |
| 18:2n-6      | $\mu\text{g}/\text{mg}$ | ND                | $0.006 \pm 0.001$   | $0.010 \pm 0.006$      | $0.003 \pm 0.001$             |
|              | % of total              |                   | $1.26 \pm 0.26$     | $1.21 \pm 0.61$        | $0.88 \pm 0.26$               |
| 18:3n-3      | $\mu\text{g}/\text{mg}$ | $0.001 \pm 0.001$ | $0.000 \pm 0.000$   | $0.001 \pm 0.000$      | $0.002 \pm 0.001$             |
|              | % of total              | $0.13 \pm 0.09$   | $0.08 \pm 0.01$     | $0.21 \pm 0.07$        | $0.54 \pm 0.18$               |
| 20:4n-6      | $\mu\text{g}/\text{mg}$ | $0.008 \pm 0.001$ | $0.004 \pm 0.000^*$ | $0.005 \pm 0.000^*$    | $0.005 \pm 0.001^*$           |
|              | % of total              | $1.25 \pm 0.09$   | $0.87 \pm 0.06$     | $0.71 \pm 0.10$        | $1.58 \pm 0.25^{\wedge}$      |
| 22:6n-3      | $\mu\text{g}/\text{mg}$ | ND                | $0.005 \pm 0.001$   | $0.003 \pm 0.001$      | $0.003 \pm 0.001$             |
|              | % of total              |                   | $1.11 \pm 0.25$     | $0.42 \pm 0.11$        | $0.97 \pm 0.21$               |
| 18:1n-9/18:0 | DI                      | $0.251 \pm 0.076$ | $0.099 \pm 0.005^*$ | $0.124 \pm 0.018^*$    | $0.102 \pm 0.009^*$           |
| 16:1n-7/16:0 | DI                      | $0.048 \pm 0.004$ | $0.012 \pm 0.002^*$ | $0.013 \pm 0.002^*$    | $0.026 \pm 0.002^{*\#\wedge}$ |

10 week old male mice were fed a lipogenic diet (LD) for 10 days and fasted 4 hours prior to tissue collection. Hepatic lipids were extracted, lipid species were separated by TLC, extracted, transmethylated and analyzed by gas liquid chromatography. DI, desaturation index. Values are mean  $\pm$  SEM, (n=4–6/group). \* $P < 0.5$  vs. WT,  $^{\#}P < 0.05$  vs. GKO;  $^{\wedge}P < 0.05$  vs. GLS5; one-way ANOVA analysis with Tukey's post-hoc test.

**Table S4. Liver phospholipid fatty acid composition in 10 d LD-fed mice**

| Fatty acid   |                         | WT              | GKO               | GLS5                 | GLS3                           |
|--------------|-------------------------|-----------------|-------------------|----------------------|--------------------------------|
| 16:0         | $\mu\text{g}/\text{mg}$ | $5.65 \pm 0.11$ | $6.69 \pm 0.30$   | $6.67 \pm 0.55$      | $6.38 \pm 0.21$                |
|              | % of total              | $22.3 \pm 0.68$ | $25.1 \pm 0.21$   | $23.5 \pm 1.43$      | $24.4 \pm 0.59$                |
| 16:1n-7      | $\mu\text{g}/\text{mg}$ | $0.70 \pm 0.01$ | $0.04 \pm 0.00^*$ | $0.05 \pm 0.00^*$    | $0.30 \pm 0.06^{*\#^{\wedge}}$ |
|              | % of total              | $2.77 \pm 0.01$ | $0.16 \pm 0.01^*$ | $0.17 \pm 0.01^*$    | $1.17 \pm 0.24^{*\#^{\wedge}}$ |
| 18:0         | $\mu\text{g}/\text{mg}$ | $3.57 \pm 0.10$ | $5.19 \pm 0.22^*$ | $5.86 \pm 0.22^*$    | $5.29 \pm 0.27^*$              |
|              | % of total              | $14.1 \pm 0.08$ | $19.5 \pm 0.21^*$ | $20.8 \pm 0.87^*$    | $20.2 \pm 0.59^*$              |
| 18:1n-9      | $\mu\text{g}/\text{mg}$ | $3.16 \pm 0.13$ | $1.36 \pm 0.04^*$ | $1.99 \pm 0.18^{\#}$ | $1.12 \pm 0.11^{\wedge}$       |
|              | % of total              | $12.5 \pm 0.29$ | $5.12 \pm 0.13^*$ | $7.02 \pm 0.58^{\#}$ | $4.31 \pm 0.40^{\wedge}$       |
| 18:1n-7      | $\mu\text{g}/\text{mg}$ | $1.11 \pm 0.13$ | $0.16 \pm 0.00^*$ | $0.15 \pm 0.01^*$    | $0.41 \pm 0.05^{*\#^{\wedge}}$ |
|              | % of total              | $4.36 \pm 0.44$ | $0.60 \pm 0.02^*$ | $0.55 \pm 0.07^*$    | $1.57 \pm 0.21^{*\#^{\wedge}}$ |
| 18:2n-6      | $\mu\text{g}/\text{mg}$ | $2.81 \pm 0.11$ | $3.80 \pm 0.16^*$ | $3.99 \pm 0.32^*$    | $3.67 \pm 0.20$                |
|              | % of total              | $11.1 \pm 0.28$ | $14.3 \pm 0.27^*$ | $14.0 \pm 0.74^*$    | $14.0 \pm 0.44^*$              |
| 20:4n-6      | $\mu\text{g}/\text{mg}$ | $3.76 \pm 0.15$ | $2.95 \pm 0.17^*$ | $3.38 \pm 0.15^*$    | $2.90 \pm 0.28^*$              |
|              | % of total              | $14.8 \pm 0.32$ | $11.1 \pm 0.42$   | $11.9 \pm 0.34$      | $11.1 \pm 0.82$                |
| 20:5n-3      | $\mu\text{g}/\text{mg}$ | $0.12 \pm 0.01$ | $0.07 \pm 0.00^*$ | $0.11 \pm 0.01^{\#}$ | $0.09 \pm 0.00$                |
|              | % of total              | $0.49 \pm 0.04$ | $0.27 \pm 0.01^*$ | $0.39 \pm 0.05$      | $0.33 \pm 0.01^*$              |
| 22:6n-3      | $\mu\text{g}/\text{mg}$ | $3.45 \pm 0.10$ | $5.35 \pm 0.25^*$ | $5.05 \pm 0.32^*$    | $4.95 \pm 0.14^*$              |
|              | % of total              | $13.6 \pm 0.57$ | $20.1 \pm 0.62^*$ | $18.0 \pm 1.60^*$    | $19.0 \pm 0.02^*$              |
| 18:1n-9/18:0 | DI                      | $0.88 \pm 0.02$ | $0.26 \pm 0.01^*$ | $0.34 \pm 0.04^*$    | $0.22 \pm 0.02^{\wedge}$       |
| 16:1n-7/16:0 | DI                      | $0.12 \pm 0.00$ | $0.01 \pm 0.00^*$ | $0.01 \pm 0.00^*$    | $0.05 \pm 0.01^{*\#^{\wedge}}$ |

10 week old male mice were fed a lipogenic diet (LD) for 10 days and fasted 4 hours prior to tissue collection. Hepatic lipids were extracted, lipid species were separated by TLC, extracted, transmethylated and analyzed by gas liquid chromatography. DI, desaturation index. Values are mean  $\pm$  SEM, (n=4–6/group). \* $P < 0.5$  vs. WT, # $P < 0.05$  vs. GKO;  $\wedge P < 0.05$  vs. GLS5; one-way ANOVA analysis with Tukey's post-hoc test.



**Table S5. Plasma cholesteryl ester fatty acid composition in 10 d LD-fed mice**

| Fatty acid   |                               | WT              | GKO               | GLS5                  | GLS3                        |
|--------------|-------------------------------|-----------------|-------------------|-----------------------|-----------------------------|
| 16:0         | $\mu\text{g}/100 \mu\text{l}$ | $5.61 \pm 0.26$ | $20.6 \pm 1.93$   | $17.0 \pm 6.99$       | $14.2 \pm 2.96$             |
|              | % of total                    | $6.84 \pm 0.15$ | $29.9 \pm 2.06^*$ | $18.4 \pm 3.72^{*\#}$ | $19.0 \pm 2.07^{*\#}$       |
| 16:1n-7      | $\mu\text{g}/100 \mu\text{l}$ | $16.3 \pm 0.88$ | $1.01 \pm 0.12^*$ | $1.68 \pm 0.36^*$     | $10.9 \pm 4.15$             |
|              | % of total                    | $19.8 \pm 1.03$ | $1.47 \pm 0.16^*$ | $1.94 \pm 0.26^*$     | $11.4 \pm 2.54^{*\#\wedge}$ |
| 18:0         | $\mu\text{g}/100 \mu\text{l}$ | $1.23 \pm 0.21$ | $18.2 \pm 2.20^*$ | $12.0 \pm 4.94$       | $13.1 \pm 3.15$             |
|              | % of total                    | $1.51 \pm 0.27$ | $26.2 \pm 1.75^*$ | $12.4 \pm 2.49^{*\#}$ | $16.4 \pm 2.03^{*\#}$       |
| 18:1n-9      | $\mu\text{g}/100 \mu\text{l}$ | $21.9 \pm 2.26$ | $11.1 \pm 1.70$   | $17.0 \pm 4.18$       | $7.70 \pm 1.57^*$           |
|              | % of total                    | $26.4 \pm 1.23$ | $15.7 \pm 0.60^*$ | $19.4 \pm 0.86^{*\#}$ | $10.3 \pm 0.89^{*\#\wedge}$ |
| 18:1n-7      | $\mu\text{g}/100 \mu\text{l}$ | $2.21 \pm 0.48$ | $0.94 \pm 0.16$   | $0.74 \pm 0.16$       | $2.49 \pm 0.87$             |
|              | % of total                    | $2.61 \pm 0.40$ | $1.44 \pm 0.34$   | $0.85 \pm 0.05^*$     | $2.67 \pm 0.50^\wedge$      |
| 18:2n-6      | $\mu\text{g}/100 \mu\text{l}$ | $32.0 \pm 1.49$ | $15.9 \pm 4.36$   | $34.3 \pm 8.22$       | $26.1 \pm 6.30$             |
|              | % of total                    | $38.9 \pm 0.85$ | $21.5 \pm 3.20$   | $40.4 \pm 7.05^\#$    | $33.9 \pm 3.76$             |
| 18:1n-9/18:0 | DI                            | $19.1 \pm 3.05$ | $0.61 \pm 0.05^*$ | $1.70 \pm 0.18^{*\#}$ | $0.65 \pm 0.06^{*\wedge}$   |
| 16:1n-7/16:0 | DI                            | $2.90 \pm 0.15$ | $0.05 \pm 0.01^*$ | $0.12 \pm 0.03^*$     | $0.68 \pm 0.19^{*\#\wedge}$ |

10 week old male mice were fed a lipogenic diet (LD) for 10 days and fasted 4 hours prior to tissue collection. Plasma lipids were extracted, lipid species were separated by TLC, extracted, transmethylated and analyzed by gas liquid chromatography. DI, desaturation index. Values are mean  $\pm$  SEM, (n=4–6/group). \* $P < 0.5$  vs. WT, # $P < 0.05$  vs. GKO;  $^\wedge P < 0.05$  vs. GLS5; one-way ANOVA analysis with Tukey's post-hoc test.

**Table S6. Plasma triglyceride fatty acid composition in 10 d LD-fed mice**

| Fatty acid   |                               | WT              | GKO              | GLS5                          | GLS3                                       |
|--------------|-------------------------------|-----------------|------------------|-------------------------------|--------------------------------------------|
| 16:0         | $\mu\text{g}/100 \mu\text{l}$ | 17.8 $\pm$ 3.23 | 10.4 $\pm$ 0.48  | 16.5 $\pm$ 3.28               | 13.0 $\pm$ 1.80                            |
|              | % of total                    | 21.5 $\pm$ 1.45 | 37.2 $\pm$ 0.83* | 35.0 $\pm$ 1.22*              | 34.7 $\pm$ 1.67*                           |
| 16:1n-7      | $\mu\text{g}/100 \mu\text{l}$ | 5.80 $\pm$ 0.98 | 0.06 $\pm$ 0.03* | 0.10 $\pm$ 0.03*              | 1.09 $\pm$ 0.28* <sup>#</sup> <sup>^</sup> |
|              | % of total                    | 6.99 $\pm$ 0.25 | 0.23 $\pm$ 0.09* | 0.19 $\pm$ 0.05*              | 2.58 $\pm$ 0.40* <sup>#</sup> <sup>^</sup> |
| 18:0         | $\mu\text{g}/100 \mu\text{l}$ | 1.35 $\pm$ 0.24 | 8.00 $\pm$ 0.37  | 12.0 $\pm$ 2.65*              | 10.1 $\pm$ 1.31*                           |
|              | % of total                    | 1.65 $\pm$ 0.17 | 28.8 $\pm$ 0.75* | 24.9 $\pm$ 1.66*              | 27.0 $\pm$ 1.51*                           |
| 18:1n-9      | $\mu\text{g}/100 \mu\text{l}$ | 40.4 $\pm$ 7.68 | 4.50 $\pm$ 0.33* | 11.3 $\pm$ 1.97* <sup>#</sup> | 6.38 $\pm$ 1.32*                           |
|              | % of total                    | 47.7 $\pm$ 1.88 | 16.1 $\pm$ 0.40* | 25.0 $\pm$ 1.99* <sup>#</sup> | 16.0 $\pm$ 0.57* <sup>^</sup>              |
| 18:1n-7      | $\mu\text{g}/100 \mu\text{l}$ | 6.57 $\pm$ 1.25 | 0.04 $\pm$ 0.02* | 0.15 $\pm$ 0.06*              | 1.49 $\pm$ 0.42* <sup>#</sup> <sup>^</sup> |
|              | % of total                    | 7.80 $\pm$ 0.56 | 0.14 $\pm$ 0.05* | 0.27 $\pm$ 0.07*              | 3.45 $\pm$ 0.74* <sup>#</sup> <sup>^</sup> |
| 18:2n-6      | $\mu\text{g}/100 \mu\text{l}$ | 10.3 $\pm$ 3.53 | 3.91 $\pm$ 0.32  | 5.55 $\pm$ 1.27               | 6.06 $\pm$ 1.84                            |
|              | % of total                    | 11.3 $\pm$ 1.75 | 14.0 $\pm$ 0.78  | 11.6 $\pm$ 0.67               | 14.2 $\pm$ 2.14                            |
| 18:1n-9/18:0 | DI                            | 29.9 $\pm$ 3.45 | 0.56 $\pm$ 0.02* | 1.05 $\pm$ 0.17* <sup>#</sup> | 0.61 $\pm$ 0.05* <sup>^</sup>              |
| 16:1n-7/16:0 | DI                            | 0.33 $\pm$ 0.02 | 0.01 $\pm$ 0.00* | 0.01 $\pm$ 0.00*              | 0.08 $\pm$ 0.01* <sup>#</sup> <sup>^</sup> |

10 week old male mice were fed a lipogenic diet (LD) for 10 days and fasted 4 hours prior to tissue collection. Plasma lipids were extracted, lipid species were separated by TLC, extracted, transmethylated and analyzed by gas liquid chromatography. DI, desaturation index. Values are mean  $\pm$  SEM, (n=4–6/group). \* $P$  < 0.5 vs. WT, # $P$  < 0.05 vs. GKO; ^ $P$  < 0.05 vs. GLS5; one-way ANOVA analysis with Tukey's post-hoc test.

**Table S7. Plasma free fatty acid composition in 10 d LD-fed mice**

| Fatty acid   |                               | WT              | GKO              | GLS5             | GLS3                                   |
|--------------|-------------------------------|-----------------|------------------|------------------|----------------------------------------|
| 16:0         | $\mu\text{g}/100 \mu\text{l}$ | 4.45 $\pm$ 0.50 | 4.64 $\pm$ 0.78  | 5.09 $\pm$ 0.49  | 4.02 $\pm$ 0.63                        |
|              | % of total                    | 35.2 $\pm$ 0.70 | 37.6 $\pm$ 1.23  | 39.1 $\pm$ 1.16  | 39.8 $\pm$ 0.71*                       |
| 16:1n-7      | $\mu\text{g}/100 \mu\text{l}$ | 1.72 $\pm$ 0.24 | 0.05 $\pm$ 0.01* | 0.05 $\pm$ 0.01* | 0.09 $\pm$ 0.02*                       |
|              | % of total                    | 13.5 $\pm$ 0.40 | 0.41 $\pm$ 0.03* | 0.38 $\pm$ 0.03* | 0.81 $\pm$ 0.12* <sup>#</sup> $\wedge$ |
| 18:0         | $\mu\text{g}/100 \mu\text{l}$ | 0.87 $\pm$ 0.07 | 4.83 $\pm$ 0.63* | 4.81 $\pm$ 0.40* | 3.98 $\pm$ 0.63*                       |
|              | % of total                    | 7.02 $\pm$ 0.56 | 40.0 $\pm$ 1.22* | 37.1 $\pm$ 1.43* | 39.7 $\pm$ 1.66*                       |
| 18:1n-9      | $\mu\text{g}/100 \mu\text{l}$ | 3.21 $\pm$ 0.42 | 0.85 $\pm$ 0.15* | 1.07 $\pm$ 0.08* | 0.63 $\pm$ 0.11*                       |
|              | % of total                    | 25.2 $\pm$ 0.68 | 6.90 $\pm$ 0.70* | 8.31 $\pm$ 0.32* | 6.31 $\pm$ 0.65*                       |
| 18:1n-7      | $\mu\text{g}/100 \mu\text{l}$ | 0.44 $\pm$ 0.04 | 0.05 $\pm$ 0.01* | 0.03 $\pm$ 0.00* | 0.09 $\pm$ 0.02* $\wedge$              |
|              | % of total                    | 3.61 $\pm$ 0.44 | 0.38 $\pm$ 0.10* | 0.26 $\pm$ 0.00* | 0.73 $\pm$ 0.14* <sup>#</sup> $\wedge$ |
| 18:2n-6      | $\mu\text{g}/100 \mu\text{l}$ | 0.88 $\pm$ 0.19 | 1.00 $\pm$ 0.21  | 0.89 $\pm$ 0.09  | 0.69 $\pm$ 0.12                        |
|              | % of total                    | 6.72 $\pm$ 0.84 | 7.90 $\pm$ 0.98  | 6.85 $\pm$ 0.18  | 6.28 $\pm$ 0.72                        |
| 20:4n-6      | $\mu\text{g}/100 \mu\text{l}$ | ND              | 0.01 $\pm$ 0.00  | 0.00 $\pm$ 0.00  | 0.01 $\pm$ 0.00                        |
|              | % of total                    |                 | 0.10 $\pm$ 0.03  | 0.03 $\pm$ 0.00  | 0.10 $\pm$ 0.06                        |
| 18:1n-9/18:0 | DI                            | 3.68 $\pm$ 0.38 | 0.17 $\pm$ 0.02* | 0.23 $\pm$ 0.01* | 0.16 $\pm$ 0.01*                       |
| 16:1n-7/16:0 | DI                            | 0.38 $\pm$ 0.02 | 0.01 $\pm$ 0.00* | 0.01 $\pm$ 0.00* | 0.02 $\pm$ 0.00* <sup>#</sup> $\wedge$ |

10 week old male mice were fed a lipogenic diet (LD) for 10 days and fasted 4 hours prior to tissue collection. Plasma lipids were extracted, lipid species were separated by TLC, extracted, transmethylated and analyzed by gas liquid chromatography. DI, desaturation index. Values are mean  $\pm$  SEM, (n=4–6/group). \* $P$  < 0.5 vs. WT, <sup>#</sup> $P$  < 0.05 vs. GKO;  $\wedge$  $P$  < 0.05 vs. GLS5; one-way ANOVA analysis with Tukey's post-hoc test.

**Table S8. Plasma phospholipid composition in 10 d LD-fed mice**

| Fatty acid   |            | WT          | GKO          | GLS5                     | GLS3                       |
|--------------|------------|-------------|--------------|--------------------------|----------------------------|
| 16:0         | % of total | 34.4 ± 1.23 | 47.9 ± 1.25* | 35.0 ± 3.31 <sup>#</sup> | 35.2 ± 2.28 <sup>#</sup>   |
| 16:1n-7      | % of total | 2.00 ± 0.11 | 0.23 ± 0.03* | 0.15 ± 0.03*             | 1.06 ± 0.24 <sup>#^</sup>  |
| 18:0         | % of total | 18.9 ± 1.05 | 18.1 ± 0.59  | 20.4 ± 1.48              | 20.0 ± 1.26                |
| 18:1n-9      | % of total | 22.9 ± 0.80 | 13.9 ± 0.74* | 14.6 ± 2.19 <sup>#</sup> | 8.30 ± 1.10 <sup>*^</sup>  |
| 18:1n-7      | % of total | 4.83 ± 0.60 | 0.50 ± 0.01* | 0.28 ± 0.03*             | 1.46 ± 0.26 <sup>*#^</sup> |
| 18:2n-6      | % of total | 10.3 ± 0.60 | 14.6 ± 1.77  | 18.1 ± 2.26*             | 21.6 ± 1.17 <sup>*#</sup>  |
| 20:4n-6      | % of total | 3.03 ± 0.13 | 1.90 ± 0.35  | 5.04 ± 1.59              | 5.01 ± 0.96                |
| 22:6n-3      | % of total | 2.39 ± 0.08 | 1.56 ± 0.22  | 4.04 ± 0.99              | 4.66 ± 0.80 <sup>#</sup>   |
| 18:1n-9/18:0 | DI         | 1.23 ± 0.11 | 0.77 ± 0.04* | 0.74 ± 0.13*             | 0.43 ± 0.07*               |
| 16:1n-7/16:0 | DI         | 0.06 ± 0.00 | 0.00 ± 0.00* | 0.00 ± 0.00*             | 0.03 ± 0.01 <sup>*#^</sup> |

10 week old male mice were fed a lipogenic diet (LD) for 10 days and fasted 4 hours prior to tissue collection. Plasma lipids were extracted, lipid species were separated by TLC, extracted, transmethylated and analyzed by gas liquid chromatography. DI, desaturation index. Values are mean ± SEM, (n=4–6/group). \**P* < 0.05 vs. WT, <sup>#</sup>*P* < 0.05 vs. GKO; <sup>^</sup>*P* < 0.05 vs. GLS5; one-way ANOVA analysis with Tukey's post-hoc test.

**Table S9. Gonadal white adipose tissue triacylglycerol fatty acid composition in LD-fed mice**

| Fatty acid   |                         | WT               | GKO               | GLS5                           | GLS3                           |
|--------------|-------------------------|------------------|-------------------|--------------------------------|--------------------------------|
| 16:0         | $\mu\text{g}/\text{mg}$ | 265.6 $\pm$ 8.58 | 163.8 $\pm$ 8.46  | 246.6 $\pm$ 2.05               | 235.1 $\pm$ 9.68               |
|              | % of total              | 24.4 $\pm$ 0.49  | 33.4 $\pm$ 1.11*  | 32.5 $\pm$ 0.72*               | 33.0 $\pm$ 1.67*               |
| 16:1n-7      | $\mu\text{g}/\text{mg}$ | 123.4 $\pm$ 5.93 | 2.38 $\pm$ 0.22*  | 4.64 $\pm$ 0.40* <sup>#</sup>  | 11.3 $\pm$ 1.04* <sup>#^</sup> |
|              | % of total              | 11.3 $\pm$ 0.40  | 0.48 $\pm$ 0.03*  | 0.61 $\pm$ 0.05*               | 1.56 $\pm$ 0.09* <sup>#^</sup> |
| 18:0         | $\mu\text{g}/\text{mg}$ | 23.4 $\pm$ 0.78  | 139.0 $\pm$ 9.15* | 179.1 $\pm$ 7.83* <sup>#</sup> | 182.0 $\pm$ 8.40* <sup>#</sup> |
|              | % of total              | 2.15 $\pm$ 0.07  | 28.4 $\pm$ 1.68*  | 23.7 $\pm$ 1.39*               | 25.6 $\pm$ 1.51*               |
| 18:1n-9      | $\mu\text{g}/\text{mg}$ | 414.6 $\pm$ 16.6 | 84.8 $\pm$ 8.06*  | 164.2 $\pm$ 11.9* <sup>#</sup> | 125.0 $\pm$ 15.6*              |
|              | % of total              | 38.0 $\pm$ 0.36  | 17.2 $\pm$ 1.17*  | 21.5 $\pm$ 1.11*               | 17.1 $\pm$ 1.43* <sup>^</sup>  |
| 18:1n-7      | $\mu\text{g}/\text{mg}$ | 41.9 $\pm$ 1.95  | 5.23 $\pm$ 0.59*  | 7.96 $\pm$ 0.67*               | 14.0 $\pm$ 1.31* <sup>#^</sup> |
|              | % of total              | 3.84 $\pm$ 0.09  | 1.06 $\pm$ 0.09*  | 1.04 $\pm$ 0.07*               | 1.93 $\pm$ 0.10* <sup>#^</sup> |
| 18:2n-6      | $\mu\text{g}/\text{mg}$ | 177.5 $\pm$ 8.10 | 77.5 $\pm$ 7.94*  | 129.1 $\pm$ 9.13* <sup>#</sup> | 124.1 $\pm$ 15.0* <sup>#</sup> |
|              | % of total              | 16.3 $\pm$ 0.61  | 15.7 $\pm$ 1.11   | 16.9 $\pm$ 0.89                | 17.0 $\pm$ 1.33                |
| 18:3n-3      | $\mu\text{g}/\text{mg}$ | 6.30 $\pm$ 0.44  | 0.83 $\pm$ 0.17*  | 2.62 $\pm$ 0.43*               | 2.52 $\pm$ 0.65*               |
|              | % of total              | 0.58 $\pm$ 0.04  | 0.17 $\pm$ 0.03*  | 0.34 $\pm$ 0.05*               | 0.33 $\pm$ 0.07*               |
| 20:4n-6      | $\mu\text{g}/\text{mg}$ | 3.06 $\pm$ 0.26  | 0.65 $\pm$ 0.09*  | 0.93 $\pm$ 0.14*               | 0.89 $\pm$ 0.17*               |
|              | % of total              | 0.28 $\pm$ 0.02  | 0.13 $\pm$ 0.02*  | 0.12 $\pm$ 0.02*               | 0.12 $\pm$ 0.02*               |
| 22:6n-3      | $\mu\text{g}/\text{mg}$ | 2.31 $\pm$ 0.26  | 0.66 $\pm$ 0.12   | 0.74 $\pm$ 0.15*               | 0.78 $\pm$ 0.22*               |
|              | % of total              | 0.21 $\pm$ 0.02  | 0.13 $\pm$ 0.02   | 0.10 $\pm$ 0.02*               | 0.10 $\pm$ 0.03*               |
| 18:1n-9/18:0 | DI                      | 17.8 $\pm$ 0.73  | 0.62 $\pm$ 0.09*  | 0.93 $\pm$ 0.09*               | 0.70 $\pm$ 0.11*               |
| 16:1n-7/16:0 | DI                      | 0.46 $\pm$ 0.01  | 0.01 $\pm$ 0.00*  | 0.02 $\pm$ 0.00*               | 0.05 $\pm$ 0.00* <sup>#^</sup> |

10 week old male mice were fed a lipogenic diet (LD) for 10 days and fasted 4 hours prior to tissue collection. Gonadal white adipose lipids were extracted, lipid species were separated by TLC, TG band was extracted, transmethylated and analyzed by gas liquid chromatography. DI, desaturation index. Values are mean  $\pm$  SEM, (n=4–6/group). \* $P$  < 0.5 vs. WT, # $P$  < 0.05 vs. GKO; ^ $P$  < 0.05 vs. GLS5; one-way ANOVA analysis with Tukey's post-hoc test.
